# Supplementary material
Source: MDPI journal article supplement (https://www.mdpi.com/2071-1050/14/24/16363)
Supplement: s1 [file s1 › sustainability-2001056-supplementary.pdf]

*Supplementary Material*

# **Assessment of Future Land Use/Land Cover Scenarios on the Hydrology of a Coastal Basin in South-Central Chile**

**Camila Orellana Pereira <sup>1</sup>, Rossana Escanilla-Minchel <sup>2</sup>, Alejandra Cortés González <sup>3</sup>,  
Hernán Alcayaga <sup>4,\*</sup>, Mauricio Aguayo <sup>5</sup>, Miguel Aguayo Arias <sup>6</sup> and Alejandro N. Flores <sup>7</sup>**

<sup>1</sup> Civil Engineering Department, Universidad Diego Portales, Santiago 8370109, Chile

<sup>2</sup> School of Geography, University of Leeds, Leeds LS2 9JT, UK

<sup>3</sup> Civil Engineering Unit, Department of Water Resources Management, Ministry of Public Works of Chile, Santiago 8370190, Chile

<sup>4</sup> School of Civil Works, Universidad Diego Portales, Santiago 8370190, Chile

<sup>5</sup> Faculty of Environmental Sciences, EULA-Chile Centre, University of Concepción, Concepción 4070386, Chile

<sup>6</sup> Faculty of Natural Resources, Universidad Católica de Temuco, Temuco 4781312, Chile

<sup>7</sup> Department of Geoscience, Boise State University, Boise, ID 83702, USA

\* Correspondence: hernan.alcayaga@udp.cl

**Supplementary Material S1: LULC changes for the references years 2008 and 2015.**

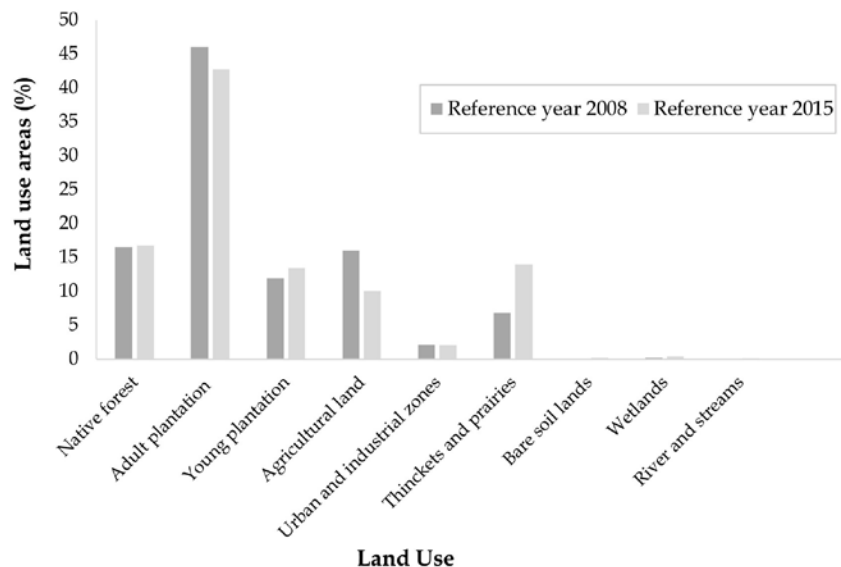

**Figure S1.** Percentual comparison of LULC areas for references years 2008 and 2015, based on CONAF.

**Table S1.** Percentual comparison of LULC areas for references years 2008 and 2015, based on CONAF.

| LULC                                 | Year 2008<br>(%) | Year 2015<br>(%) |
|--------------------------------------|------------------|------------------|
| Native forest                        | 16.54            | 16.79            |
| Adult plantation (non-native forest) | 46.06            | 42.75            |
| Young plantation (non-native forest) | 11.93            | 13.46            |
| Agricultural land                    | 16.03            | 10.07            |
| Urban and industrial zones           | 2.19             | 2.12             |
| Thickets and prairies                | 6.83             | 13.98            |
| Bare soil lands                      | 0.11             | 0.26             |
| Wetlands                             | 0.23             | 0.40             |
| River and streams                    | 0.08             | 0.16             |

## Supplementary Material S2: Calibration parameters for SWAT hydrological model.

**Table S2.** Parameters used in the calibration process.

| Parameter |          | Description                                                                                                                   | Range                 | 2003 | 2004 | 2005 | 2006 | 2007 | Average |
|-----------|----------|-------------------------------------------------------------------------------------------------------------------------------|-----------------------|------|------|------|------|------|---------|
| MGT1      | CN2      | SCS initial runoff curve number for moisture condition II                                                                     | -                     | -85% | -80% | -62% | -62% | -80% | -74%    |
|           | GW_DELAY | Groundwater lag time (days)                                                                                                   | [0 - 400]             | 45   | 10   | 40   | 40   | 10   | 29      |
|           | ALPHA_BF | Base flow alpha factor (days)                                                                                                 | [0,1 - 0.3] [0.9 - 1] | 0.1  | 0.95 | 0.2  | 0.2  | 0.9  | 0.47    |
|           | GWQMN    | Threshold water depth in a shallow aquifer required for backflow to occur (mm H <sub>2</sub> O)                               | [0 - 5000]            | 250  | 0.1  | 7    | 7    | 1    | 53.02   |
| GW        | GW_REVAP | “Revap” coefficient of groundwater                                                                                            | [0.02 - 0.2]          | 0.02 | 0.02 | 0.05 | 0.05 | 0.05 | 0.038   |
|           | REVAPMN  | Threshold water depth in a shallow aquifer necessary for “revap” or percolation to the aquifer to occur (mm H <sub>2</sub> O) | [0 - 500]             | 250  | 100  | 11   | 11   | 0.3  | 74.46   |
|           | RCHRG_DP | Percolation fraction of deep aquifer                                                                                          | [0 - 1]               | 1    | 0.47 | 0.5  | 0.5  | 0.2  | 0.534   |
|           | HRU_SLP  | Average slope of the hillside (m/m)                                                                                           | -                     | -10% | -50% | 92%  | 92%  | 2%   | 25%     |
|           | OV_N     | Manning's "n" value for overland flow                                                                                         | [0.01 - 0.41]         | 0.3  | 0.25 | 0.41 | 0.41 | 0.25 | 0.324   |
| HRU       | CANMX    | Maximum awning storage (mm H <sub>2</sub> O)                                                                                  | [0-100]               | 10   | 0    | 15   | 15   | 0    | 8       |
|           | ESCO     | Soil evaporation compensation factor                                                                                          | [0.01 -1]             | 0.4  | 0.2  | 0.2  | 0.2  | 0.01 | 0.202   |
|           | EPCO     | Plant absorption compensation factor                                                                                          | [0.01 -1]             | 0.7  | 0.1  | 0.8  | 0.8  | 1    | 0.68    |
|           | SOL_Z1   | Depth from the soil surface to the bottom of the layer (mm)                                                                   | -                     | -71% | -81% | -70% | -70% | -81% | -75%    |
|           | SOL_BD1  | Bulk density (Mg/m <sup>3</sup> or g/cm <sup>3</sup> )                                                                        | [1.1 -1.9]            | 1.39 | 1.9  | 1.29 | 1.29 | 1.9  | 1.554   |
| SOL       | SOL_AWC1 | Available water capacity of the soil layer (mm H <sub>2</sub> O/mm of soil)                                                   | [0 - 1]               | 0.4  | 0.16 | 0.4  | 0.4  | 0.16 | 0.304   |
|           | SOL_K1   | Saturated hydraulic conductivity (mm/h)                                                                                       | [0 - 2000]            | 33   | 1.75 | 33   | 33   | 1.75 | 20.5    |
|           | CH_N2    | Manning's "n" value for the main channel                                                                                      | [-0.01 - 0.3]         | 0.15 | 0.3  | 0.15 | 0.15 | 0.3  | 0.21    |
| RTE       | CH_K     | Effective hydraulic conductivity in the main channel alluvium (mm/h)                                                          | [-0.01 - 500]         | 1.81 | 1    | 1.81 | 1.81 | 1    | 1.486   |

Where MGT1 corresponds to general management, GW is groundwater, HRU is hydrological response units, SOL is soils and RTE corresponds to main channel.

**Supplementary Material S3: Adjutment indicators for the calibration and validation periods.**  
**These parametres were selected in the calibration phase and were applied to both periods.**

**Table S3.** Results of the hydrological model performance for the calibration period.

| Calibration (2003-2007) |                |                   |      |                   |        |                   |      |                   |
|-------------------------|----------------|-------------------|------|-------------------|--------|-------------------|------|-------------------|
| Parameter set by year   | R <sup>2</sup> | Model performance | NS E | Model performance | PBI AS | Model performance | KG E | Model performance |
| 2003                    | 0.96           | Very good         | 0.96 | Very good         | 0.27   | Very good         | 0.98 | Very good         |
| 2004                    | 0.91           | Very good         | 0.91 | Very good         | -1.36  | Very good         | 0.95 | Very good         |
| 2005                    | 0.95           | Very good         | 0.95 | Very good         | 4.38   | Very good         | 0.95 | Very good         |
| 2006                    | 0.98           | Very good         | 0.97 | Very good         | -0.27  | Very good         | 0.92 | Very good         |
| 2007                    | 0.94           | Very good         | 0.92 | Very good         | -4.76  | Very good         | 0.92 | Very good         |
| Mean                    | 0.91           | Very good         | 0.91 | Very good         | -1.18  | Very good         | 0.94 | Very good         |

**Table S4.** Results of the hydrological model performance for the validation period.

| Validation (2008-2016) |                |                   |      |                   |        |                   |      |                   |
|------------------------|----------------|-------------------|------|-------------------|--------|-------------------|------|-------------------|
| Parameter set by year  | R <sup>2</sup> | Model performance | NS E | Model performance | PBI AS | Model performance | KG E | Model performance |
| 2003                   | 0.62           | Good              | 0.65 | Good              | 6.49   | Very good         | 0.74 | Satisfactory      |
| 2004                   | 0.67           | Good              | 0.53 | Satisfactory      | -22.98 | Satisfactory      | 0.71 | Satisfactory      |
| 2005                   | 0.71           | Good              | 0.73 | Good              | 8.74   | Very good         | 0.82 | Good              |
| 2006                   | 0.71           | Good              | 0.73 | Good              | 8.74   | Very good         | 0.82 | Good              |
| 2007                   | 0.70           | Good              | 0.38 | Unsatisfactory    | -13.95 | Good              | 0.66 | Satisfactory      |
| Mean                   | 0.75           | Good              | 0.73 | Good              | -5.67  | Very good         | 0.85 | Good              |

**Supplementary Material S4: Water balance results for the years 2015, 2025, 2035 and 2045, for each hydrological component.**

**Table S5.** Water balance results for the years 2015, 2025, 2035 and 2045.

| YEAR | ET (mm) | PERC (mm) | SURQ (mm) | LAT_Q (mm) | GW_Q (mm) | WYLD (mm) | DISCH (m <sup>3</sup> /s) |
|------|---------|-----------|-----------|------------|-----------|-----------|---------------------------|
| 2015 | 440.61  | 58.84     | 285.41    | 118.08     | 27.33     | 463.00    | 9.96                      |
| 2025 | 435.83  | 74.90     | 277.48    | 113.99     | 34.81     | 467.30    | 10.78                     |
| 2035 | 442.17  | 101.49    | 276.06    | 83.79      | 47.12     | 462.00    | 10.95                     |
| 2045 | 430.71  | 82.41     | 274.85    | 114.18     | 38.27     | 472.19    | 11.00                     |
